# Supplementary material
Source: PubMed Central journal article supplement (PMC3852691)
Supplement: NIHMS531945-supplement-01.pdf [file NIHMS531945-supplement-01.pdf]

## **Supplementary information**

### **Extraordinarily low evolutionary rates of short wavelength-sensitive opsin pseudogenes**

Shozo Yokoyama<sup>a</sup>, William T. Starmer<sup>b</sup>, Yang Liu<sup>a</sup>, Takashi Tada<sup>a</sup>, Lyle Britt<sup>c</sup>

<sup>a</sup>Department of Biology, Emory University, Atlanta, Georgia 30322

<sup>b</sup>Department of Biology, Syracuse University, Syracuse, NY 13244

<sup>c</sup>Alaska Fisheries Science Center, National Marine Fisheries Service, National Oceanic and Atmospheric Administration, Seattle, WA 98115

**Table S1.**

The opsin genes considered.

| Gene <sup>a</sup>           | Organism                                          | GenBank (accession no.) |
|-----------------------------|---------------------------------------------------|-------------------------|
| SWS1 genes                  |                                                   |                         |
| <i>Caur<sub>S1</sub></i>    | goldfish ( <i>Carassius auratus auratus</i> )     | D85863                  |
| <i>Drer<sub>S1</sub></i>    | zebrafish ( <i>Danio rerio</i> )                  | AB087810                |
| <i>Ssal<sub>S1</sub></i>    | Atlantic salmon ( <i>Salmo salar</i> )            | AY214133                |
| <i>Bden<sub>S1</sub></i> ψ  | pearleye ( <i>Benthalbella dentate</i> )          | JX564538                |
| <i>Sleu<sub>S1</sub></i>    | lampfish ( <i>Stenobranchius leucopsarus</i> )    | FJ443127                |
| <i>Olat<sub>S1</sub></i>    | medaka ( <i>Oryzias latipes</i> )                 | AB223058                |
| <i>Pret<sub>S1</sub></i>    | guppy ( <i>Poecilia reticulata</i> )              | DQ234861                |
| <i>Onil<sub>S1</sub></i>    | tilapia ( <i>Oreochromis niloticus</i> )          | AF191221                |
| <i>Nbris<sub>S1</sub></i> ψ | cichlid ( <i>Neolamprologus brichardi</i> )       | AY775096                |
| <i>Nmon<sub>S1</sub></i> ψ  | cichlid ( <i>Neolamprologus mondabu</i> )         | HM135147                |
| <i>Lcha<sub>S1</sub></i> ψ  | coelacanth ( <i>Latimeria chalumnae</i> )         | (Yokoyama et al. 1999)  |
| <i>Lmen<sub>S1</sub></i> ψ  | coelacanth ( <i>Latimeria menadoensis</i> )       | (Yokoyama, Tada 2000)   |
| <i>Xlae<sub>S1</sub></i>    | frog ( <i>Xenopus laevis</i> )                    | U23463                  |
| <i>Cliv<sub>S1</sub></i>    | pigeon ( <i>Columba livia</i> )                   | AF149234                |
| <i>Acar<sub>S1</sub></i>    | American chameleon ( <i>Anolis carolinensis</i> ) | AF134192                |
| <i>Taus<sub>S1</sub></i>    | bat ( <i>Taphozous australis</i> )                | EU912383                |
| <i>Mful<sub>S1</sub></i>    | bat ( <i>Miniopterus fuliginosus</i> )            | GQ863406                |
| <i>Raff<sub>S1</sub></i> ψ  | bat ( <i>Rhinolophus affinis</i> )                | EU912364                |
| <i>Rfer<sub>S1</sub></i> ψ  | bat ( <i>Rhinolophus ferrumequinum</i> )          | EU912380                |
| <i>Hsap<sub>S1</sub></i>    | human ( <i>Homo sapiens</i> )                     | M13295                  |
| <i>Cfam<sub>S1</sub></i>    | dog ( <i>Canis lupus familiaris</i> )             | XM_539386               |
| <i>Btau<sub>S1</sub></i>    | bovine ( <i>Bos taurus</i> )                      | U92557                  |
| <i>Scro<sub>S1</sub></i>    | pig ( <i>Suss crofa</i> )                         | AY091587                |
| <i>Eful<sub>S1</sub></i>    | Brown lemur ( <i>Eulemur fulvus</i> )             | AB111464                |
| <i>Dmad<sub>S1</sub></i>    | Aye-Aye ( <i>Daubentonia madagascariensis</i> )   | EF667285                |
| <i>Gsen<sub>S1</sub></i> ψ  | galago ( <i>Galago senegalensis</i> )             | AB111465                |
| <i>Ncou<sub>S1</sub></i> ψ  | loris ( <i>Nycticebus coucang</i> )               | AB111466                |
| <i>Ttru<sub>S1</sub></i> ψ  | dolphin ( <i>Tursiops truncatus</i> )             | AF055458                |
| <i>Mden<sub>S1</sub></i> ψ  | beaked whale ( <i>Mesoplodon densirostris</i> )   | AY228441                |
| <i>Mnov<sub>S1</sub></i> ψ  | humpback whale ( <i>Megaptera novaeangliae</i> )  | AY228440                |
| <i>Bacu<sub>S1</sub></i> ψ  | minke whale ( <i>Balaenoptera acutorostrata</i> ) | AF545490                |
| <i>Bmus<sub>S1</sub></i> ψ  | blue whale ( <i>Balaenoptera musculus</i> )       | AF545484                |
| <i>Bmys<sub>S1</sub></i> ψ  | bowhead whale ( <i>Balaena mysticetus</i> )       | AF545491                |
| <i>Dcap<sub>S1</sub></i> ψ  | common dolphin ( <i>Delphinus capensis</i> )      | AB462251                |
| <i>Ddel<sub>S1</sub></i> ψ  | saddle dolphin ( <i>Delphinus delphis</i> )       | AB462250                |
| <i>Dleu<sub>S1</sub></i> ψ  | beluga whale ( <i>Delphinapterus leucas</i> )     | AF545485                |

|                           |                                                            |          |
|---------------------------|------------------------------------------------------------|----------|
| <i>Egla<sub>s</sub>ψ</i>  | right whale ( <i>Eubalaena glacialis</i> )                 | AF545492 |
| <i>Erob<sub>s</sub>ψ</i>  | gray whale ( <i>Eschrichtius robustus</i> )                | AF545493 |
| <i>Gmac<sub>s</sub>ψ</i>  | short-finned dolphin ( <i>Globicephala macrorhynchus</i> ) | AB462241 |
| <i>Gmel<sub>s</sub>ψ</i>  | pilot whale ( <i>Globicephala melas</i> )                  | AY228442 |
| <i>Kbre<sub>s</sub>ψ</i>  | pygmy sperm whale ( <i>Kogia breviceps</i> )               | AF545486 |
| <i>Igeo<sub>s</sub>ψ</i>  | Amazon river dolphin ( <i>Inia geoffrensis</i> )           | AF545495 |
| <i>Lbor<sub>s</sub>ψ</i>  | whale dolphin ( <i>Lissodelphis borealis</i> )             | AB462244 |
| <i>Lhos<sub>s</sub>ψ</i>  | Fraser's dolphin ( <i>Lagenodelphis hosei</i> )            | AB462254 |
| <i>Lobl<sub>s</sub>ψ</i>  | white-sided dolphin ( <i>Lagenorhynchus obliquidens</i> )  | AB462245 |
| <i>Mbid<sub>s</sub>ψ</i>  | beaked whale ( <i>Mesoplodon bidens</i> )                  | AF545496 |
| <i>Pbla<sub>s</sub>ψ</i>  | La Plata dolphin ( <i>Pontoporia blainvillei</i> )         | AF545483 |
| <i>Pcat<sub>s</sub>ψ</i>  | sperm whale ( <i>Physeter catodon</i> )                    | AF545482 |
| <i>Pcra<sub>s</sub>ψ</i>  | false killer whale ( <i>Pseudorca crassidens</i> )         | AB462242 |
| <i>Pgan<sub>s</sub>ψ</i>  | Ganges river dolphin ( <i>Platanista gangetica</i> )       | AF545487 |
| <i>Pgro<sub>s</sub>ψ</i>  | harp seal ( <i>Phoca groenlandica</i> )                    | AY228445 |
| <i>Ppho<sub>s</sub>ψ</i>  | harbor porpoise ( <i>Phocoena phocoena</i> )               | AB462255 |
| <i>Psins<sub>s</sub>ψ</i> | vaquita ( <i>Phocoena sinus</i> )                          | AF545489 |
| <i>Pvit<sub>s</sub>ψ</i>  | harbor seal ( <i>Phoca vitulina</i> )                      | AY228444 |
| <i>Sbre<sub>s</sub>ψ</i>  | rough-toothed dolphin ( <i>Steno bredanensis</i> )         | AB462246 |
| <i>Schi<sub>s</sub>ψ</i>  | humpback dolphin ( <i>Sousa chinensis</i> )                | AB462248 |
| <i>Scoe<sub>s</sub>ψ</i>  | striped dolphin ( <i>Stenella coeruleoalba</i> )           | AB462249 |
| <i>Sfro<sub>s</sub>ψ</i>  | spotted dolphin ( <i>Stenella frontalis</i> )              | AB462252 |
| <i>Slon<sub>s</sub>ψ</i>  | spinner dolphin ( <i>Stenella longirostris</i> )           | AB462243 |

RH1 genes

|                            |                                         |          |
|----------------------------|-----------------------------------------|----------|
| <i>Sana<sub>RH1A</sub></i> | pearleye ( <i>Scopelarchus analis</i> ) | EF517404 |
| <i>Sana<sub>RH1B</sub></i> | pearleye ( <i>Scopelarchus analis</i> ) | EF517405 |

RH2 gene

|                           |                                         |          |
|---------------------------|-----------------------------------------|----------|
| <i>Sana<sub>RH2</sub></i> | pearleye ( <i>Scopelarchus analis</i> ) | EF517406 |
|---------------------------|-----------------------------------------|----------|

---

<sup>a</sup>Greek letters ψ denote pseudogenes.

**Table S2.**

Log-likelihood values and parameter estimates for the 29 cetacean and two seal SWS1 pseudogenes

| Model | Parameter                                                                                                  | log-likelihood | Sites under positive selection |                |
|-------|------------------------------------------------------------------------------------------------------------|----------------|--------------------------------|----------------|
|       |                                                                                                            |                | NEB                            | BEB            |
| M1    | $p_0 = 0.372$ ( $p_1 = 0.628$ ),<br>$\omega_0 = 0.396$ ( $\omega_1 = 1$ )                                  | -1056.824      | Not allowed                    |                |
| M2    | $p_0 = 0.9$ , $p_1 = 0$ ( $p_2 = 0.1$ )<br>$\omega_0 = 0.753$ , $\omega_1 = 1$ ,<br>( $\omega_2 = 5.855$ ) | -1047.477      | 69 <b>107</b> 118              | <b>107</b> 118 |
| M7    | $p = 0.893$ , $q = 0.152$                                                                                  | -1057.327      | Not allowed                    |                |
| M8    | $p_0 = 0.901$ ( $p_1 = 0.099$ ),<br>$p = 99$ , $q = 32.137$ ,<br>$\omega = 5.881$                          | -1045.669      | 69 <b>107</b> 118              | <b>107</b> 118 |

Sites with  $P < 0.01$  levels are shown in bold.

|                        |                                                                                          |    |
|------------------------|------------------------------------------------------------------------------------------|----|
| Goldfish               | M-----DAWTYQFGNLSKISPFEGPQYHLAPKWAFYLAQAFMGFVFFVGT-PLNAIVLF                              | 52 |
| Zebrafish              | M-----DAWAVQFGNASKVSPFEGEQYHIAPKWAFYLAQAFMGFVFFVGT-PMNGIVLF                              | 52 |
| Tilapia                | M-----GKYFHLYENISKVSPFEGPQYYLAPTWAFYLAQAFMGFVLFAGT-PLNFVVLV                              | 52 |
| Medaka                 | M-----GKYFYLYENISKVGPYDGPQYYLAPTWAFYLAQAFMGFVFFVGT-PLNFVVLV                              | 52 |
| Pearleye $\psi$        | R-----KNFHLYENISKVSPFEGPQYHLAPMWFYFQTAFMGFVLFVGT <del>X</del> PLNLIVLL                   | 52 |
| Guppy                  | M-----GKHFHLYENISKVDPFEGSQHYLAPAWAFHLQALFMGFVFFAGT-PLNLLVLL                              | 52 |
| Salmon                 | M-----GKDFHLYENISKISPFEGPQYHLASMWAFYLAQAFMGFVFFAGT-PLNFIILV                              | 52 |
| Lampfish               | M-----GKHFHLYENVSKVSPFEGPQYYLAPHVWFYLAQAFMGFVFFAGT-PLNFIVLF                              | 52 |
| Cichlid-Nbri $\psi$    | -----KYFHLYENISKISPFEGPQYYLAPVWVWFYLAQAFMGFVFLAGT-PLNFVVLV                               | 50 |
| Cichlid-Nmon $\psi$    | M-----GKYFHLYENISKISPFEGPQYYLAPVWVWFYLAQAFMGFVFFAGA-PLNFVVLV                             | 52 |
| Coelacanth-Lmen $\psi$ | M----LRGEDFYLFKNISSVGLWDGLQYHIAPIWAFYLAQAVFMGMFFVGT-LLNAIVLI                             | 54 |
| coelacanth-Lcha $\psi$ | M-----FSKISSVGLWDGLQYHIAPIWAFYLAQAVFMGMFFVGT-LLNAIVLI                                    | 54 |
| Frog                   | M----LEEEFYLFKNVSNVSPFDGPOYHIAPKWAFYLAQAFMGVFLIGT-PLNFIVLL                               | 54 |
| Chameleon              | M----SGQEDFYLFENISSVGPWDGPOYHIAPWAFYFQTAFMGFVFFAGT-PLNAIILI                              | 54 |
| Pigeon                 | M----SGDEEFYLFKNGSSVGPWDGPOYHIAPPWAFYLAQAFMGFVFLVGT-PFNAIVLV                             | 54 |
| Human                  | M--RKMS-EEEFYLFKNISSVGPWDGPOYHIAPVWAFYLAQAFMGTVFLIGF-PLNAMVLV                            | 56 |
| bat-Taus               | -----NISSVGPWDGPOYHIAPVWAFHLQAFMGFVFFVGT-PLNATVLV                                        | 43 |
| bat-Mful               | -----FMGFVFFVGT-PLNATVLV                                                                 | 17 |
| bat-Raff $\psi$        | -----NIS-VGPW----- <del>X</del> WVFRLAQAFVGFVFIAGM-PLNA----                              | 30 |
| bat-Rfer $\psi$        | -----NIS-VGPW----- <del>X</del> WAFRLAQAFVGFVFIAGM-PLNA----                              | 30 |
| Brown lemur            | M--CKMSGEEEFYLFKNLSPVGPWDGPOYHIAPVWAFYLAQAFMGLVFFAGA-PLNVMVLV                            | 57 |
| aye-aye                | M--RKMSGEE-FYLFKNLSSVGPWDGPOYHIAPVWAFYLAQAFMGFVFFAGT-PLNVMVLV                            | 56 |
| Dog                    | M--SKMSGEEEFYLFKNISLVGPWDGPOYHIAPVWAFHLQAVFMGFVFFAGT-PLNGTVLV                            | 57 |
| Bovine                 | M--SKMSEEEEFLLFKNISLVGPWDGPOYHLAPVWAFHLQAVFMGFVFFVGT-PLNATVLV                            | 57 |
| Pig                    | MSKMPEEEEEEFLLFKNISLVGPWDGPOYHLAPVWVWFHLQAFMGFVFLVGT-PLNATVLV                            | 59 |
| Galago $\psi$          | V--GKMSGEGVFY <del>X</del> -----HLAPVWAFCLQEAQAFMGFVFFAGT-PFNIVIVLV                      | 42 |
| loris $\psi$           | V--SNMSGKEELY <del>X</del> -----HLAPVWAFYLAQAFMGFVFFAGT-PLNVMVLV                         | 42 |
| Dolphin $\psi$         | M--RKMSEEEEF <del>X</del> LFKNI <del>XX</del> VGPWDGPOYRHLAPVWGFHLHAAFTGFVFLVWR-ALDATVLV | 57 |
| beaked whale $\psi$    | M--SKMSEEEEFLLF--ISLVGPWDGPOHHLAPVWAFHLQAAFTGFVFFVET-PLNATVLV                            | 55 |
| humpback whale $\psi$  | M--SKMSEEEEFLLFKNISLVGPWDGPOYHLTPVWAFHLQAAFTGFVFFVGM-PLNATVLV                            | 57 |
| pilot whale $\psi$     | M-- <del>X</del> MSEEEEFLLFKNI <del>XX</del> VGPWDGPOYRLAPVWAFHLQAAFTGFVFFVGT-PLDATVLV   | 57 |
| harbor seal $\psi$     | M--SKMSEEEEFYLFKNISLVGPWDGPOYHIAPVWAFRLQAVFVGFVFFAGT-PLNASVLV                            | 57 |
| harp seal $\psi$       | M--RKMSEEEEFYLFKNISLVGPWDGPOYHIAPVWAFRLQAVFMGFVFFAGT-PLNASVLV                            | 57 |

**Fig. S1.** Aligned amino acid sequences of SWS1 opsins. Amino acid site numbers are shown in right. Dashes (-), Xs, and \* (stars) indicate the sites of indels, incomplete codons, and stop codons, respectively.

|                  |                                                                |     |
|------------------|----------------------------------------------------------------|-----|
| Goldfish         | VTMKYKKLRQPLNYILVNISLGG---FIFD-TFS-VSQVFFSALRGYFFGYTLCAMEAAM   | 109 |
| Zebrafish        | VTMKYKKLRQPLNYILVNISLAG---FIFD-TFS-VSQVFVCAARGYFFLGYTLCAMEAAM  | 109 |
| Tilapia          | ATMKYKKLRVPLNFILVNISFSG---FIFV-TFS-VSQVFLASMRGYFFLGHTLCALEAAV  | 109 |
| Medaka           | ATAKYKKLRVPLNYILVNITFAG---FIFV-TFS-VSQVFLASVRGYFFGQTLCALEAAV   | 109 |
| Pearleyeψ        | VMIIYKRLRVPLNYVLINVSLAG---FIFV-TFS-VSQVFISSTS*YYFLGHTLRALESCM  | 109 |
| Guppy            | ATAKYKKLRAPLNYILVNISFAG---FIFV-TFS-VSQVFVASLRGYFFLGYTLCAMEAAM  | 109 |
| Salmon           | VTVKYKKLRQPLNFILVNISLAG---FIFV-TFS-VSQVSVSSARGYFFLGYTLCAMEACM  | 109 |
| Lampfish         | VTMKYKKLRVPLNYILVNISLAG---FIFV-TFS-VSQVSVSTTKGYFFLGHTMCALESCM  | 109 |
| Cichlid-Nbriψ    | ATMKYKKLRVPLNFILVNISFCG---FIFV-TFSXVSQVSVSSMRGYFFLGHTLCALESAB  | 109 |
| Cichlid-Nmonψ    | ATMKYKKLRVPLNFILVNISFCG---FIFVXTFS-VSQVSVSSXRGYFFLGHTLCALESAB  | 110 |
| coelacanth-Lmenψ | VTLKYNKL*QPLNYILLNISLAG---FIVC-LFX-IFTVFISSSRGYFIFGRAVCAIESFL  | 111 |
| coelacanth-Lchaψ | VTLKYNKL*QPLNYILLNISLAG---FIVC-LFX-IFTVFISSSRGYFIFGRX-----     | 95  |
| Frog             | VTIKYKKLRQPLNYILVNITVGG---FLMC-IFS-IFPVFVSSSQGYFFFGRIACSIDAFV  | 111 |
| Chameleon        | VTVKYKKLRQPLNYILVNISFAG---FLFC-TFS-VFTVFMASQGYFFFGRHVCAMEAFL   | 111 |
| Pigeon           | VTIKYKKLRQPLNYILVNISFSG---FISC-IFS-VFTVSVSSSQGYFIFGKDMCALEAFV  | 111 |
| Human            | ATLRYKKLRQPLNYILVNVSFSG---FLLC-IFS-VFPVVFASCNQGYFVFGRHVCALEGFL | 113 |
| bat-Taus         | ATLRYKTLRQPLNYILVNVSLGG---FLFC-IFS-VSTVVFASQGYFIFGRHVCALEAFL   | 100 |
| bat-Mful         | ATLRYKKLRQPLNYILVNVSLGG---FLFC-IFS-VFTVVFASXQGYFIFGRRVCALEAFX  | 74  |
| bat-Raffψ        | -TLRYRKLWQPLNYILVNVSRGGXVGFLFC-VFX-GFTVFMASCQGC-IFGRRVYALGDFL  | 87  |
| bat-Rferψ        | -TLCYRKLWQPLNYILVNVLGRGXGGFLFC-VFX-GFTVFMASCQGC-IFGRCVYALGDFL  | 87  |
| Brown lemur      | ATLRYKKLRQPLNYILVNVSFSG---FLCC-IFS-VLPVFIASCRGYFLFGRHVCALEGFL  | 114 |
| aye-aye          | ATLRYKKLRQPLNYVNVNVSFSG---FLFC-IFS-VFPVFIASCRGYFVFGRHVCALEGFL  | 113 |
| Dog              | ATLRYKKLRQPLNYILVNVSLGG---FLYC-I-S-VSTVFIASQGYFVFGRHVCALEAFL   | 113 |
| Bovine           | ATLRYRKLWQPLNYILVNVSLGG---FIYC-IFS-VFIVFITSCYGYFVFGRHVCALEAFL  | 114 |
| Pig              | ATLRYRKLWQPLNYILVNVSLGG---FIYC-IFS-VFSVFIASCHGYFVFGRRVCALEAFL  | 116 |
| Galagoψ          | ATLCYKKLWQPLSYILVNVSLGG---ILYC-ILS-VLPIFVASCQGYFLFGCHACALEGFL  | 99  |
| lorisψ           | ATLCYKKLWQPLSYILVNVSSGG---FLYC-IFS-VLPIFVASC*GYFFPGCHACALEGFL  | 99  |
| Dolphinψ         | ATLRYRKLWQPLNYILVNVSLGG---FIYC-IFS-VFVVFITSCHGYFVFGRHVCALEAFL  | 114 |
| beaked whaleψ    | ATLRYRKLWQPLNYILVNVSLGG---FIYC-IFS-LX-VFITSCHGYFVFGHHVCALEAFL  | 111 |
| humpback whaleψ  | ATLRYRKLWQPLNYILVNVSLGG---FIYC-TFS-LXXVFITSCHGYFVFGSHVCALEAFL  | 114 |
| pilot whaleψ     | ATLRYRKLWQPLNYILVNVSLGG---FIYX-XF-----GRHVCALEAFL              | 98  |
| harbor sealψ     | ATLRYKKLRQPLNYILVNVSLGG---FLYC-IPV-SSXXFIASQGYFIFGRHVCALEAFL   | 114 |
| harp sealψ       | ATLRYKKLWQPLNYILVNVSLGG---FLYC-ISV-SSXVFMASCQGYFIFGRHVCALEAFL  | 114 |

Fig. S1. (continued).

|                  |                                                                |     |
|------------------|----------------------------------------------------------------|-----|
| Goldfish         | GSIA-GLVTGWSLAVLAFERYVVICKPFGSFKFGQSQALGAVALTWIIGIGCA-TPPFFGW  | 168 |
| Zebrafish        | GSIA-GLVTGWSLAVLAFERYVVICKPFGSFKFGQGQAVGAVVFTWIIIGTACA-TPPFFGW | 168 |
| Tilapia          | GAIA-GLVTAWSLAVLSFERYLVIKPFQAFKFGSNHALAAVAFTWFMGVGCA-CPPFFGW   | 168 |
| Medaka           | GAVA-GLVTSWSLAVLSFERYLVIKPFQAFKFGSNHALAAVIFTWFMGVGCA-CPPFFGW   | 168 |
| Pearleyeψ        | GSIT-GLVTAWSLAVLSLVRYLVIKPFQAFKFTGNHALAAVGFTWLMGIGCA-TPPFFGW   | 168 |
| Guppy            | GAVA-GLVTSWSLAVLSFERFLVIKPFQAFKFGSTHAAAAVVFTWFMGVGCA-SPPFFGW   | 168 |
| Salmon           | GSIA-GLVSAWSLAVLAFERYVVICKPFGTFKFDNNQALAAVAFTWVMGIGCA-TPPFFGW  | 168 |
| Lampfish         | GSIA-GLVTAWSLAVLSLERYLVICKTFQAFKFGSNHALAAVAFTWIMGIGCA-TPPFFGW  | 168 |
| Cichlid-Nbriψ    | GSVA-GLVTAWSLAVXSFERYLVICKPFGAFKFGSNHALAAVAFTWFMGVGCA-CPPFFGW  | 168 |
| Cichlid-Nmonψ    | GSXA-GLVTAWSLAXLSFERYLVIKPFQAFKFGSNHALAAVAFTWFMGVGCA-CPPFFGW   | 169 |
| coelacanth-Lmenψ | GSMT-GLITGXT---LAFERDIVICKPFSNFCFGSKQSLAVGATWVIXTXVQXLPPVFGW   | 168 |
| coelacanth-Lchaψ | -----FERDIVICKPFSNFCFGSKQSLAVGATWVIXTXVQXLP-----               | 134 |
| Frog             | GTLT-GLVTGWSLAVLAFERYIVICKPMGNFNFSSSHALAVVICTWIIIGIVVS-VPPFFGW | 170 |
| Chameleon        | GSVA-GLVTGWSLAVLAFERYIVICKPFGNFRFNSKHALLVVAATWFIIGIGVS-IPPFFGW | 170 |
| Pigeon           | GATG-GLVTGWSLAVLAFERYIVICKPFGNFRFNSKHALMAVVATWVIGLVA-LPPFFGW   | 170 |
| Human            | GTVA-GLVTGWSLAVLAFERYIVICKPFGNFRFSSKHALTVVLATWTIGIGVS-IPPFFGW  | 172 |
| bat-Taus         | GSTA-GLVTGWSLAVLAFERYIVICKPFGSFRFSSKHALMVVLATWTIGIGVS-IPPFFGW  | 159 |
| bat-Mful         | GSTA-GLXTGWSLAVLAFERYIVICKPFGSFRFSSKHALLVVLATWAIIGIGVS-IPPFFGW | 133 |
| bat-Raffψ        | GSMA-GLVTGWSXAVLAFERYIVICKPFGSFRFSSKRRARMVVLAAWTIGIGVS-IPPFSG* | 146 |
| bat-Rferψ        | GSMA-GLVTGWSXAVLASEHYTVICKPFGSFRFSSKHARMVVLAAWTIGIGVS-IPPFSV*  | 146 |
| Brown lemur      | GSAA-GLVIGWSLAVLAFERYVIICKPFGNFRFSSKHALMVVLATWTIGVGS-IPPFFGW   | 173 |
| aye-aye          | GSVA-GLVIGWSLAVLAFERYIVICKPFGNFRFSSKHALMVVLATWTIGIGVS-IPPFFGW  | 172 |
| Dog              | GSTA-GLVTGWSLAVLAFERYIVICKPFGNFRFSSKHALMVVLATWTIGIGVS-IPPFFGW  | 172 |
| Bovine           | GCTA-GLVTGWSLAVLAFERYIIICKPFGNFRFSSKHALMVVAVATWTIGIGVS-IPPFFGW | 173 |
| Pig              | GSAA-GLVTGWSLAVLAFERYIIICKPFGNFRFSSKHALIAVLATWAIIGIGVS-IPPFFGW | 175 |
| Galagoψ          | SSVA-GLVIGWSLAVLAFECYIVICKPFGNFCFSFKPALMVVLAIWTIGIGIS-ISTXFGW  | 158 |
| loris            | SSAA-GLVIGWSLAVLAFELYIAICKPFSNFCFGSKHVMVVPAA*-----             | 144 |
| Dolphinψ         | GRTA-GLLTGWSLAVLAFERYIIICKPFGNFRFSSKHALMVVLATWTIGIGVS-IPPFFGW  | 173 |
| beaked whaleψ    | GYTA-G----WSLAVLAFERYIIICKPFGNFRFSSKHALMVVLATWTIGIGAS-IPPFFGW  | 166 |
| humpback whaleψ  | GCTA-G----WSLAVLAFERYIIICKPCGNFRFSSKHALTVVLATWTIGIGVS-IPPFFGW  | 169 |
| pilot whaleψ     | GRTA-G----WSLAVLAFERYIIICKPFGNFRFSSKHALMVVLATWTIGIGVS-IPPFFGW  | 153 |
| harbor sealψ     | APTA-G----WSLAVLAFERYMVICKPFGNFRFSSKHALMVVLATWTIGVGS-IPPFFGW   | 169 |
| harp sealψ       | APTAXG----WSLAVLAFERYMVICKPFSNFRFSSKNALMVVLATWTIGVGS-IPPFFGW   | 170 |

**Fig. S1.** (continued).

|                   |                                                                                                                                                                                                           |     |
|-------------------|-----------------------------------------------------------------------------------------------------------------------------------------------------------------------------------------------------------|-----|
| Goldfish          | SRY-IPEGIGTA--CG-PDWYTKNEEYNTESYTYFLLVSCFMMP--IMIITFSYSQLLGAL                                                                                                                                             | 223 |
| Zebrafish         | SRY-IPEGLGTA--CG-PDWYTKSEEYNSESYTYFLLITCFMMP--MTIIIFSYSQLLGAL                                                                                                                                             | 223 |
| Tilapia           | SRY-IPEGLGCS--CG-PDWYTHNEEYNTTSYIYFLLITCFIFP--LTIIIFCYSQLLGAL                                                                                                                                             | 223 |
| Medaka            | SRY-IPEGLGCS--CG-PDWYTNCEEFSCASYSKFLLVTCFICP--ITIIIFSYSQLLGAL                                                                                                                                             | 223 |
| Pearleyeψ         | SRY-IPEGLGCS--CG-LDWYTHNEEFNCTSYVYFLMV-----                                                                                                                                                               | 202 |
| Guppy             | SRY-IPEGLGCS--CG-PDWYTHNEEYGCTSYMYFLLITCFCMP--LSIIIFSYSQLLGAL                                                                                                                                             | 223 |
| Salmon            | SRY-IPEGLGCS--CG-PDWYTNNEEYHCASYTKFLIVTCFLMP--MSIIFFSYSQLLGAL                                                                                                                                             | 223 |
| Lampfish          | SRY-IPEGLGCS--CG-PDWYTHNEEFHCTSYMYFLMVTCFVAP--LTIIIFSYSQLLGAL                                                                                                                                             | 223 |
| Cichlid-Nbriψ     | SRY-IPEGLGCS--CG-PDWYTHNVEYNTNX <del>Y</del> THFLMLTCFIIP--LTIIIFCYSQLLGAL                                                                                                                                | 223 |
| Cichlid-Nmonψ     | SRY-IPEGLGCS--CG-PDWYTHNVEYNTNSYTHFLMLTCFIIP--LTIIIFCYSQLLGAL                                                                                                                                             | 224 |
| coelacanth-Lmenψ  | SQY-IPEGLQCS--CG-PEWYTVNNKWNNEYSYVIFLFSFCFGLP--LSIIIFS <del>Y</del> TKLLMTL                                                                                                                               | 223 |
| coelacanth-Lchayψ | -----CS--CG-PEWYTVNNKWNNEYSYVIFLFSFCFGLP--LSIIIFS <del>Y</del> TKLL---                                                                                                                                    | 177 |
| Frog              | SRY-MPEGLQCS--CG-PDWYTVGTKYRSEY <del>Y</del> TWFLFIFCFVIP--LSLICFSYGRLLGAL                                                                                                                                | 225 |
| Chameleon         | SRY-IPEGLQCS--CG-PDWYTVGTKYKSEY <del>Y</del> TWFLFIFCFIVP--LTLIIFSYSQLLGAL                                                                                                                                | 225 |
| Pigeon            | SRY-VPEGLQCS--CG-PDWYTVGTKYKSEY <del>Y</del> TWFLFIFCFIVP--LSLIIFSYSQLLSAL                                                                                                                                | 225 |
| Human             | SRF-IPEGLQCS--CG-PDWYTVGTKYRSESY <del>Y</del> TWFLFIFCFIVP--LSLICFSY <del>T</del> QLLRAL                                                                                                                  | 227 |
| bat-Taus          | SRF-IPEGLQCS--CG-PDWYTVGTRYRSEY <del>Y</del> TWFLFVFCFIVP--LSLICFSYSQLLRAL                                                                                                                                | 214 |
| bat-Mful          | SRF-IPEGLQCS--CG-PDWYTVGTKYRSEY <del>Y</del> TWFLFIFCFIVP--LSLVCFSYSQLLGAL                                                                                                                                | 188 |
| bat-Raffψ         | SRF-APEGLQCS--CG-PDWY--GTKYGEDCT*FLFIFCVTVP--LPR <del>X</del> CCSYSQLLGAL                                                                                                                                 | 199 |
| bat-Rferψ         | SQF-APEGLQCS--CS-PDWYTLGTKYGEDCTWFL-----P <del>X</del> ICCSYSQLLGXL                                                                                                                                       | 192 |
| Brown lemur       | SRF-IPEGLQCS--CG-PDWYTVGTKYRSEY <del>Y</del> TWFLFIFCFIVP--LSLICFSYSQLLRAL                                                                                                                                | 228 |
| aye-aye           | SRF-IPEGLQCS--CG-PDWYTVGTKYHSEY <del>Y</del> TWFLFIFCFIVP--LSLICFSYSQLLGAL                                                                                                                                | 227 |
| Dog               | SRF-IPEGLQCS--CG-PDWYTVGTKYRSEY <del>Y</del> TWFLFIFCFIVP--LSLICFSY <del>L</del> QLLRAL                                                                                                                   | 227 |
| Bovine            | SRF-VPEGLQCS--CG-PDWYTVGTKYYSEY <del>Y</del> TWFLFIFCYIVP--LSLICFSYSQLLGAL                                                                                                                                | 228 |
| Pig               | SRF-LPEGLQCS--CG-PDWYTVGTKYYSEY <del>Y</del> TWFLFIFCYIVP--LALICFSYSQLLRAL                                                                                                                                | 230 |
| Galagoψ           | S*F-IPEGLQCSF <del>X</del> WG-PSY <del>Y</del> H <del>X</del> GTKYYHEY <del>Y</del> TWFLFIFCFIVL--LSLICFSYSQLLGXL                                                                                         | 215 |
| lorisψ            | --F-IPKGLQCS--CG-PNWYTVGTKYYSEYCAWFLFIFCFILP--LSLICFSYSQLLGAL                                                                                                                                             | 197 |
| Dolphinψ          | SRF-APEGLQCS-- <del>X</del> ----- <del>X</del> TVGTKYYSEY <del>Y</del> TWFLFIFCYIVP--LSLICFSYSQLLGVF                                                                                                      | 224 |
| beaked whaleψ     | SRF-VPEGLQCP--CG-PNWYTVGTKYYSEY <del>Y</del> TWFLFIFCYIV <del>X</del> --LSLICFSYSQLLGVF                                                                                                                   | 221 |
| humpback whaleψ   | SRF-VPKGLQCS--CG-PDWYTVGTKYYSEY <del>Y</del> TWFLFIFCYIVP--LSLICFSYSQLLGVF                                                                                                                                | 224 |
| pilot whaleψ      | SRF-VPEGLQXS--C-----TVGTKYYSEY <del>Y</del> TWFLFIFCYIVPL <del>X</del> LSLICFSYSQLLGVF                                                                                                                    | 205 |
| harbor sealψ      | SRF-IPEGLQCS--CG-PDWYVPVGT <del>K</del> HRSEY <del>Y</del> TWFLFIFCF <del>X</del> V <del>P</del> --LSLICFSYSQLLGAL                                                                                        | 224 |
| harp sealψ        | SRF <del>X</del> IPEGLQCS--CG <del>X</del> PTRY <del>P</del> VGT <del>K</del> H <del>X</del> NEY <del>Y</del> TWFL- <del>I</del> <del>X</del> <del>C</del> <del>X</del> RVP--LSLICFSYSQLL <del>X</del> AL | 226 |

Fig. S1. (continued).



|                  |                                                                |     |
|------------------|----------------------------------------------------------------|-----|
| Goldfish         | RAVA-AQQAE-SASTQKAEKEVSRMVVVMVGSFVVCYGP-YAITALYFSYAEDSNKDYRLV  | 281 |
| Zebrafish        | RAVA-AQQAE-SESTQKAEREVSRMVVVMVGSFVLCYAP-YAVTAMYFANSDEPNKDYRLV  | 281 |
| Tilapia          | RAVA-AQQAE-SASTQKAEKEVSRMIIVMVGSFVTCYGP-YALAALYFAYSTDENKDYRLV  | 281 |
| Medaka           | RAVA-AQQAE-SASTQKAEKEVSRMIIVMVGSFVTCYGP-YALTAQYYAYSQDENKDYRLV  | 281 |
| Pearleyeψ        | ---A-AQQAE-SASTQKAEREVSRMIVMTVGSYVTCSGP-YAIAALYFATSTDENKDYRLV  | 257 |
| Guppy            | RAVA-AQQAE-SASTQKAEKEVSRMIIVMVGSFVTCYGP-YALTGLWYANSEEVNKDYRLV  | 281 |
| Salmon           | RAVA-AAQAE-SASTQKAEKEVSRMIVMVGSFILCYGP-YALAGLYFAYTTSENKDYRLV   | 281 |
| Lampfish         | RAVA-AQQAE-SASTQKAEKEVSRMIIVMVGSFITCYGP-YAIAALYFANSTDENKDYRLV  | 281 |
| Cichlid-Nbriψ    | RAVA-AQQAE-SASTQKAEKEVSRMIIVMVGSFVTCYGP-YALAALYFAYSTEENKDYRLV  | 281 |
| Cichlid-Nmonψ    | RAVA-AQHAE-SASTQKAEKEVSRMIIVMVGSFVTCYGP-YALAALYFAYSTEENKDYRLV  | 282 |
| coelacanth-Lmenψ | HTX*VAKQQEQSASQAQKAEREVXKMIIVMVLGFLMCWLP-YASFALWVITHRGEPPDLRMA | 283 |
| coelacanth-Lchap | -----SASTQKAEREVTKMIVMVLGFLMCWLP-YASFALWVITHRGEPPDLRMA         | 226 |
| Frog             | RAVA-AQQQE-SASTQKAEREVSRMIVFMVGSFCLCYVP-YAAMAMYMTNRNHGLDLRLV   | 283 |
| Chameleon        | RAVA-AQQQE-SATTQKAEREVSRMVVVMVGSFCLCYVP-YASLAMYMVNNRDHGLDLRLV  | 283 |
| Pigeon           | RAVA-AQQQE-SATTQKAEREVSRMVVVMVGSFCLCYVP-YAALAMYVNNRNHGLDLRLV   | 283 |
| Human            | KAVA-AQQQE-SATTQKAEREVSRMVVVMVGSFCVCYVP-YAAFAMYVNNRNHGLDLRLV   | 285 |
| bat-Taus         | RAVA-AQQQE-SASTQKAEREVSRMVVVMVGSFCLCYVP-YAALAMYVNNRNHGLDLRLV   | 272 |
| bat-Mful         | RAVA-AQQQE-SASTQKAEREVSRMVVVMVGSFCLCYVP-YAALAMYVNNRNHGLDLRLV   | 246 |
| bat-Raffψ        | RAVA-AEQQQ-XTLTQKAEQ-VSHMVVGTVGSFCLRYVP-YAALTMSMVNSHPHGLDLQLV  | 256 |
| bat-Rferψ        | RAVA-AEQQ*-XTWTQMAEQ-VRHMVVGTVGSFCLWYVP-YAALTMSMVNSHPHGLDLRLV  | 249 |
| Brown lemur      | RAVA-AQQQE-SATTQKAEREVSRMVVVMVGSFCLCYVP-YAALAMYVNNRNHGLDLRLV   | 286 |
| aye-aye          | RAVA-AQQQE-SATTQKAEREVSRMVVVMVGSFCLCYVP-YATLAMYMVNNRNHGLDLRLV  | 285 |
| Dog              | RAVA-AQQQE-SASTQKAEREVSRMVVVMVGSFCLCYTP-YAAMAMYVNNRNHGLDLRLV   | 285 |
| Bovine           | RAVA-AQQQE-SASTQKAEREVSHMVVVMVGSFCLCYTP-YAALAMYVNNRNHGVDLRLV   | 286 |
| Pig              | RAVA-AQQQE-SASTQKAEREVSHMVVVMVGSFCVCYTP-YAALAMYVNNRNHGVTLRLV   | 288 |
| Galagoψ          | RDVA-AQQQE-SAMTHKAEREVSHMVVLMVGSFCXCYVPXYAALAMYVNNNSNHGRDLLLLV | 274 |
| lorisψ           | RAVA-VQQQ-----AHKAEQ-MSHMVVVMVGSFCXCYML-YAALAMYVNNNCNHGLDLLFV  | 250 |
| Dolphinψ         | RAVA-AQQQE-AATTQKAGREVSHKVVMMVGSFCLCYTP-YAALAMYVNNNHGHVDLRFV   | 282 |
| beaked whaleψ    | RAV--TQQQE-SGTTQKAEREMSHMVVMMVGSFCLCYTP-CAALPMYVNNRNHGVDLRFV   | 278 |
| humpback whaleψ  | RAV--TQQQE-SATTQKAEREVSHTVMMVGSFCLCCTP-YAALAMYVNNNHGHVDLRFV    | 281 |
| pilot whaleψ     | RAV--TQQQE-AATTQKAGREVSHKVVMMVGSFCLCYTP-YAALAMYVNNHKQGVDLRFV   | 262 |
| harbor sealψ     | RAV--TQQQE-SASTQKAEREVSRTVVMMVGSLLCLCYTP-YAAMAMDMVNNRNHGLDLRLV | 281 |
| harp sealψ       | RAV--TQQQE-SASTQKAEREVSRTVVMMVGSLLCXYP-YAAMAMDMVNNRNHGLHLRLV   | 283 |

Fig. S1. (continued).

|                        |                                                                     |     |
|------------------------|---------------------------------------------------------------------|-----|
| Goldfish               | AIPSLFSKSSCVYNPLIYAFMNKQFNACIMETVFGKKIDESSEVSS---KTETSSVSA          | 336 |
| Zebrafish              | AIPAFFSKSSCVYNPLIYAFMNKQFNACIMETVFGKKIDESSEVSS---KTETSSVSA          | 336 |
| Tilapia                | TIPAFFSKSSCVYNPLIYVFMNKQFNGCIMEMVFGKKMDESSEVST---KTEVSTAS           | 335 |
| Medaka                 | TIPAFFSKSSCVYNPLIYAFMNKQFNGCIMEMVFGKKMEEASEVSS---KTEVSTAS           | 335 |
| Pearleye $\psi$        | TIPAFFSKSACVYNPLIYAFMNKQFNACIMETVLGRKIEEASEMSS---KTDGSSVSSTDS       | 315 |
| Guppy                  | TIPAFFSKSSCVYNPLIYAFMNKQFNACIMEMVFGKKMEEASEVSS---KTEVSTAS           | 335 |
| Salmon                 | TIPAFFSKSSCVYNPLIYAFMNKQFNACIMETVFGKQIEETS-VSAS--KTEVSTA            | 334 |
| Lampfish               | TIPAFFSKSSCVYNPLIYAFNLNKQFNACIMETVFGKKMEDASEVSS---KTGVSSVSTAS       | 338 |
| Cichlid-Nbri $\psi$    | TIPAFFSKSACVYNPLIYVFMNKQFNGCIMEMVFGKTMDESSEVST---KTEVSTAS           | 335 |
| Cichlid-Nmon $\psi$    | XIPAFFSKSACVYNPLIYVFMNKQFNGCIMEMVFGKTMDESSEVST---KTEVSTAS           | 336 |
| coelacanth-Lmen $\psi$ | SIPSVFSKASTVYNPIIYIFMNKQ                                            | 307 |
| coelacanth-Lcha $\psi$ | SIPSVFPK                                                            | 234 |
| Frog                   | TIPAFFSKSSCVYNPIIYCFMNKQFRGCIMETVCGRPMSDDSSVSSTSORTEVSTVSSSQVSPA    | 347 |
| Chameleon              | TIPAFFSKSSCVYNPIIYCFMNKQFRACILETVCGKPMSESDVSSSAQKTEVSSVSSSQVSPS     | 347 |
| Pigeon                 | TIPAFFSKSSCVYNPIIYCFMNKQFRACILELVCGRPMTDDSDVSSSAQRTEVSSVSSSQVSPS    | 347 |
| Human                  | TIPSFFSKSACIYNPIIYCFMNKQFQACIMKMVCGKAMTDES-TCSSQKTEVSTVSSTQVGPN     | 348 |
| bat-Taus               | TIPAFFSKSSCVYN                                                      | 286 |
| bat-Mful               | TIPAFFSKSACV                                                        | 258 |
| bat-Raff $\psi$        | TIPAFFSKSAGVSN                                                      | 270 |
| bat-Rfer $\psi$        | TIPAFFSKSACVYN                                                      | 263 |
| Brown lemur            | TIPAFFSKSACVYNPIIYCFMNKQFQACIMEMVCGKAMTDESNTSSS-QKTEVSTFSSSQVGPN    | 349 |
| aye-aye                | TIPAFFSKSACVYNPIIYCFMNKQFQACILGMVCGKAVTDESNTSSS-WKMVSTVSSSQVGPN     | 348 |
| Dog                    | TIPAFFSKSACVYNPIIYCFMNKQFRACIMEMVCGKSMTEDESSEMSSS-QKTEVSTVSPSQVGPN  | 348 |
| Bovine                 | TIPAFFSKSACVYNPIIYCFMNKQFRACIMEMVCGKPMTDESELSSS-QKTEVSTVSSSQVGPN    | 349 |
| Pig                    | TIPAFFSKSACIYNPIIYCFMNKQFRACIMEMVCGKPMTDESMSSS-QKTEVSTVSSTQVGPN     | 351 |
| Galago $\psi$          | TIPAFFSKSACVYNPIIYCFMNSKQFQACIMEMVCRKALTDESNI FSP-QKTEVSTVSSSHV GPI | 337 |
| loris $\psi$           | TIPAFFSKSACVYNPII-CFMNKQFQACIMEMVCRKDV TDES DIFSP-QKMEVSILF         | 305 |
| Dolphin $\psi$         | TIPSFFSKSACIYNPIIYCFMNKQFQACIMKMVCGKAMTDES DTCSS-QKTEVSTVSSTQVGPN   | 345 |
| beaked whale $\psi$    | TIPAFFSKSX                                                          | 289 |
| humpback whale $\psi$  | TIPAFFSKSACVYNPIIYCFMNKQFRACIMEMVCGKPMTDESMSSS-QKMEVPTVSSSQVGPN     | 344 |
| pilot whale $\psi$     | TIPAFFPKSACVYNPIIYCFMNKQFQACIMEMVCGRPMTDESMSSS-QKMEVSTVXSSQVGPN     | 325 |
| harbor seal $\psi$     | TIPAFFSKSACVYNPIIYCFMNKQFRACIMEMVCGKSM TDDSEMSSS-QKTEVSTV           | 336 |
| harp seal $\psi$       | TIPAFFFKSACVYNPIIYCFMNKQFRACIEMVCGKSM TDDSEMSSS-QKTEVSTVKP          | 340 |

**Fig. S1.** (continued).

# A

31 264

HrbrPorpoi

```
gtggggccgtgggatgggcctcagtaccgcctcgcccctgtctgggccttcgcagccttc  
acgggctttgtcttcggtgtagggacgccactcaatgccacagtgctgggtggccacactg  
tgctacagaaagttgcggcagccactcaactgcattctgggtcaatgtatccctgggggtc  
ttcatctactgcatcttcaccggatactttgtcttccgccatggttgctctgggg  
gccttcctgggctgtacagcaggt
```

vaquita-S1

```
gtggggccgtgggatgggcctcagtaccgcctcgcccctgtctgggccttcgcagccttc  
acgggctttgtcttcggtgtagggacgccactcaatgccacagtgctgggtggccacactg  
tgctacagaaagttgcggcagccactcaactgcattctgggtcaatgtatccctggggggc  
ttcatctactgcatcttcaccggatactttgtcttccgccatggttgctctgggg  
gccttcctgggctgtacagcaggt
```

PWsiddDolp

```
gtggggccgtgggatgggcctcagtaccgcctcgcccctgtctgggccttcgcagccttc  
acgggctttgtcttcggtgtagggacgccactcgatgccacagtgctgggtggccacactg  
cgctacagaaagttgcggcagccactcaactacattctgggtcaatgtatccctggggggg  
ttcatctactgcatcttcaccggatactttgtcttctgccatggttgctctgggg  
gccttcctgggcccgtacagcaggt
```

WhaleDolph

```
gtggggccgtgggatgggcctcagtaccgcctcgcccctgtctgggccttcgcagccttc  
acgggctttgtcttcggtgtagggacgccactcgatgccacagtgctgggtggccacactg  
cgctacagaaagttgcggcagccactcaactacattctgggtcaatgtatccctggggggg  
ttcatctactgcatcttcaccggatactttgtcttccaccatggttgctctgggg  
gccttcctgggcccgtacagcaggt
```

saddleDolp

```
gtggggccgtgggatgggcctcagtaccgcctcgcccctgtctgggccttcgcagccttc  
acgggctttgtcttcggtgtagggacgccactcgatgccacagtgctgggtggccacactg  
cgctacagaaagttgcggcagccactcaactacattctgggtcaacgtatccctggggggc  
ttcatctactgcatcttcaccggatactttgtcttccgccatggttgctctgggg  
gccttcctgggcccgtacagcaggt
```

stripedDol

```
gtggggccgtgggatgggcctcagtaccgcctcgcccctgtctgggccttcgcagccttc  
acgggctttgtcttcggtgtagggacgccactcgatgccacagtgctgggtggccacactg  
cgctacagaaagttgcggcagccactcaactacattctgggtcaacgtatccctggggggc  
ttcatctactgcatcttcaccggatactttgtcttccgccatggttgctctgggg  
gccttcctgggcccgtacagcaggt
```

**Fig. S2.** Data set used for detecting positively selected amino acid sites. (A) nucleotide sequence file. (B) tree file.

SpotdDolph

gtggggccgtgggaagggcctcagtaccgcctcgcccctgtctgggccttcgcagccttc  
acgggctttgtcttcggtgtagggacgccactcgatgccacagtgctgggtggccacactg  
cgctacagaaagttgcggcagccactcaactacattctgggtcaacgtatccctggggggc  
ttcatctactgcatcttcatcaccggatactttgtcttccgccatggtttgtgctctgggg  
gccttcctgggcccgtacagcaggt

DolphinSW1

gtggggccgtgggatgggcctcagtatcgccctcgcccctgtctggggccttcgcagccttc  
acgggctttgtcttccttggttggaggcactcgatgccacagtgctgggtggccacactg  
cgctacagaaagttgcggcagccactcaactacattctgggtcaacgtatccctggggggc  
ttcatctactgcatcttcatcaccggatactttgtcttccgccatggtttgtgctctgggg  
gccttcctgggcccgtacagcaggt

CommonDolp

gtggggccgtgggatgggcctcagtaccgcctcgcccctgtctgggccttcgcagccttc  
acgggctttgtcttcggtgtagggacgccactcgatgccacagtgctgggtggccacactg  
cgctacagaaagttgcggcagccactcaactacattctgggtcaacgtatccctggggggc  
ttcatctactgcatcttcatcaccggatactttgtcttccgccatggtttgtgctctgggg  
gccttcctgggcccgtacagcaggt

FkillWhale

gtggggccgtgggatgggcctcagtaccgcctcgccccgtctgggccttcgcagccttc  
acgggctttgtcttcggtgtagggacgccactcgatgccacagtgctgggtggccacactg  
cgctacagaaagttgcggcagccactcaactacattctgggtcaatgtatccctggggggc  
ttcatctactgcatcttcatcaccggatactttgtcttccgccatggtttgtgctctgggg  
gccttcctgggcccgtacagcaggt

SFpiltWhal

gtggggccgtgggatgggcctcagtaccgcctcgcccctgtctgggccttcgcagccttc  
acgggctttgtcttcggtgtagggacgccactcgatgccacagtgctgggtggccacactg  
cgctacagaaagttgcggcagccactcaactacattctgggtcaatgtatccctggggggc  
ttcatctactgcatcttcatcaccggatactttgtcttccgccatggtttgtgctctgggg  
gccttcctgggcccgtacagcaggt

FrasersDol

gtggggccgtgggatgggcctcagtaccgcctcgcccctgtctgggccttcgcagccttc  
acgggctttgtcttcggtgtagggacgccactcgatgccacagtgctgggtggccacactg  
cgctacagaaagttgcggcagccactcaactacattctgggtcaacgtatccctggggggc  
ttcatctactgcatcttcatcaccggatactttgtcttccgccatggtttgtgctctgggg  
gccttcctgggcccgtacagcaggt

humpbckDol

gtggggccgtgggatgggcctcagtaccgcctcgcccctgtctgggccttcgcagccttc  
acgggctttgtcttcggtgtagggacgccactcgatgccacagtgctgggtggccacactg  
cgctacagaaagttgcggcagccactcaactacattctgggtcaacgtatccctggggggc  
ttcatctactgcatcttcatcaccggatactttgtcttccgccatggtttgtgctctgggg  
gccttcctgggcccgtacagcaggt

**Fig. S2.** (continued).

spinnerDol

gtggggccggtgggatgggcctcagtaccgcctcgcccctgtctgggccttcgcagccttc  
acgggctttgtcttcgttgtagggacgccactcgatgccacagtgctgggtggccacactg  
cgctacagaaagttgcggcagccactcaactacattctgggtcaacgtatccctggggggc  
ttcatctactgcatcttcatcaccggatactttgtcttccgccatgtttgctctctgggg  
gccttcctgggcccgtacagcaggt

rfTthdDolp

gtggggccggtgggatgggcctcagtaccgcctcgcccctgtctgggccttcgcagccttc  
atgggctttgtcttcgttgtagggacgccactcgatgccacagtgctgggtggccacactg  
cgctacagaaagttgcggcagccactcaactacattctgggtcaatgtatccctggggggc  
ttcatctactgcatcttcatcaccggatactttgtcttccgccatgtttgctctctgggg  
gccttcctgggcccgtacagcaggt

beluga--S1

gtggggccgcgggatgggcctcagtaccgcctcgcccctgtctgggccttcgcagccttc  
acgggctttgtctttgttgtagggacgccactcaatgccacagtgctgggtggccacactg  
tgctacagaaagttgcggcagccactcaactacattctgggtcaatgtatccctggggggc  
ttcatctactgcatcttcatcaccggatactttgtcttccgccatgtttgctctctgggg  
gccttcctgggctgtacagcaggt

AmazonDolp

gtggggccggtgggatgggcctcagtaccgcctcgcccctgtctgggccttcgcagccttc  
atgggctttgtcttcgttgtagggacgccactcaatgccacagtgctgggtggccacactg  
cactacagaaagttgtggcagccactcaactacattctgggtcaatgtatccctggggggc  
ttcatctactgcatcttcatcaccggatactttgtcttccctccatgtttgctctctgggg  
gccttcctgggctgtacagcaggt

LaPlataDol

gcggggccggtgggatgggcctcagtaccgcctcgcccctgtctgggccttcgcagccttc  
acgggctttgtcttctttgttagggacgccactcaattccacagtgctgggtggccacactg  
cgctacagaaagttgtggcagccactcaactacattctggccaatgtatccctggggggc  
ttcatctactgcatcttcatcaccggatactnngtctttccgccatgtttgctctctgggg  
gccttcctgggctgtacagcaggt

SbeakdWhal

gtggggccggtgggatgggcctcagcaccaccttgcccctgtctgggccttcgcagccttc  
acgggctttgtcttctttgttagggacgccactcaatgccacagtgctgggtggccacactg  
cgctacagaaagttgcggcagccactcaactacattctgggtcaatgtatccctggggggc  
ttcatctacttcaacttcatcaccggatactttgtcttccaccatgtttgctctctgggg  
gccttcctgggctatacagcaggt

BeakdWhale

gtggggccggtgggatgggcctcagcaccaccttgcccctgtctgggccttcgcagccttc  
acgggctttgtcttctttgttagagacgccactcaatgccacagtgctgggtggccacactg  
cgctacagaaagttgcggcagccactcaactacattctgggtcaatgtatccctggggggc  
ttcatctactgcatcttcatcaccggatactttgtcttccaccatgtttgctctctgggg  
gccttcctgggctatacagcaggt

**Fig. S2.** (continued).

riverdolph

gtggggccggtgggatgggcctcagtaccacctcgcccctttctgggccttcgcagccttc  
acgggctttgtcttctttgtagggatgccactcaatgccacagtgctgggtggccacactg  
tgctacagaaagttgtggcagccactcaactacattgtgggtcaatgtaccctggggggc  
ttcatctactgcatcttcatcaccggatactttgtcttccgcatggtttatgctctgggg  
gccttctgggctgtacagcaggt

PgSprmWhal

gtggggctgtggatgagcctcagtaccacctcgcccctgtctgggccttcgcagccttc  
acgggctttgtcttctttgtagggacgcccctcaatgccacagtgctgggtggccacgctg  
cgctacagaaagttgcgccagccacgcccactacattctgggtcaatgtatccctggggggc  
ttcatctactgcatcttcatcaccggatactttgtcttctgccacggtttgtgctctgggg  
gccttctgggctgtacagcaggt

SpmWhaleS1

gtggggccggtggatgggcctcagtaccacctcgcccctgtctgggccttcgcagccttc  
acgggctttgtcttctttgtagggacgcccctcaatgccacagcgtgggtggtcacgctg  
cgctacagaaagttgcgccagccactcaactgcattctgggtcaatgtatccctggggggc  
ttcatctactgcatcttcatcaccggatactttgtcttctgccacggtttgtgctctgggg  
gccttctgggctgtacagcaggt

BwhedWhale

gtggggccggtgggatgggcctcagtaccacctcaccctgtctgggtcttcgcagccttc  
acgggctttgtcttctttgtagggacgcccactcagtgccacagtgctgggtggccagactg  
cgctacagaaagttgcagcagccactcaactatattctgggtcaatgtatccctggggggc  
ttcatctactgcatcttcatcaccgaatactttgtcttctgccatggtttgtgctctggag  
gccttctgggctgtacagcaggt

rightWhale

gtggggccggtgggatgggcctcagtaccacctcaccctgtctgggtcttcgcagccttc  
acgggctttgtcttctttgtagggacgcccactcagtgccacagtgctgggtggccagactg  
cgctacagaaagttgcagcagccactcaactatattctgggtcaatgtatccctggggggc  
ttcatctactgcatcttcatcaccgaatactttgtcttccgcatggtttgtgctctggag  
gtcttctgggctgtacagcaggt

minkeWhale

gtggggccggtgggatgggcctcagtaccacctcaccctgtctgggccttcgcagccttc  
acgggctttgtcttctttgtagggatgccactcaatgccacagtgctgggtggccacactg  
cgctacagaaagttgcgccagccactcaactatattctgggtcaatgtatctctggggggc  
ttcatctactccatcttcatcaccgaatactttgtcttccagccatgtctgtgctttggag  
gccttctgggctgtacagcaggt

bluewhalS1

gtggggccggtgggatgggcctcagtaccacctcaccctgtctgggccttcgcagccttc  
acgggctttgtcgtctctgtagggatgccactcaatgccacagtgctgggtggccacactg  
cgctacagaaagttgcgccagccactcaactatattctgggtcaatgtatccctggggggc  
ttcatctactgcatcttcatcaccgaatactttgtcttccgcatggtttgtgctctggag  
gccttctgggctgtacagcaggt

**Fig. S2.** (continued).

humpbackS1

gtggggccgtgggatgggcctcagtaccacctcaccctgtctgggccttcgcagccttc  
acgggctttgtcttctttgtagggatgccactcaatgccacagtgctgggtggccacactg  
cgctacagaaagttgcggcagccactcaactatattctgggtcaatgtatccctggggggc  
ttcatctactgcaccttcacaccgaatactttgtcttcagccatgtttgctctggag  
gccttcctgggctgtacagcaggc

Grey-Whale

gtggggccgtgggatgggcctcagtaccacctcaccctgtctgggccttcgcagccttc  
acgggctttgtcctctttgtagggatgccactcaatgccacagtgctgggtggccacactg  
cgctacagaaagttgcggcagccactcaactacattctgggtcaatgtacccctggggggc  
ttcatctactgcaccttcacaccgactactttgtcttcagccatgtttgctctggag  
gccttcctgggctgtccagcaggt

HrbrSealS1

gtggggccatgggatgggcctcagtaccacattgccccgtctgggccttcgcagtccttc  
ataggctttgtcttctttgcagggacaccactcaatgcctcggtgctgggtggccaccctg  
cgctacaagaagttgcgacagccactcaactatattctgggtcaatgtgtccctggggggc  
ttcctctactgcaccttcacgccggatacttcacctttcgccatgtttgctctggag  
gccttcctggcccctacagcaggc

HarpSealS1

gtggggccatgggatgggcctcagtaccacattgccccgtctgggccttcgcagtccttc  
atgggctttgtcttctttgcagggacaccactcaatgcctcggtgctgggtggccaccctg  
cgctacaagaagttgcaacagccactcaactatattctgggtcaatgtgtccctggggggc  
ttcctctactgcaccttcacggccggatacttcacctttcgccatgtttgctctggag  
accttcctggcccctacagcaggc

## B

31 1

```
(((((HrbrPorpoi,vaquita-S1),(PWsiddDolp,WhaleDolp),  
(DolphinSW1,stripedDol,SpotdDolph,(saddleDolp,CommonDolp)),(F  
killWhale,SFpiltWhal),FraserDol,humpbckDol,spinnerDol,rftthd  
Dolp)),beluga--S1),(AmazonDolp,LaPlataDol)),(SbeakdWhal,  
BeakdWhale)),riverdolph),(PgSprmWhal,SpmWhaleS1)),((BwhedWhal  
e,rightWhale),(minkeWhale,(bluewhalS1,humpbackS1),Grey-  
Whale)),(HrbrSealS1,HarpSealS1));
```

**Fig. S2.** (continued).
